# Supplementary material
Source: publisher figshare collection journal article supplement (https://geolsoc.figshare.com/articles/dataset/_/3453863)
Supplement: Supplementary file 1 [file 1]

**Supplement 2.** Selected cathodoluminescence images of zircon grains in the analysed samples. Numbers are from left to right.

**CL-08-66:** (1) round and rounded, (2) oval and subangular to subrounded, (3) oval and subangular to subrounded, (4) oval and euhedral.

**87RG3:** (1) oval and subangular to subrounded, (2) elongated and subangular to subrounded, (3) elongated and euhedral.

**SdR-138:** (1) oval and subangular to subrounded, (2) oval and subangular to subrounded, (3) elongated and subangular to subrounded.

**CL-08-73:** (1) round and subangular to subrounded, (2) round and subangular to subrounded, (3) oval and subangular to subrounded, (4) elongated and euhedral.

**02-66:** (1) oval and rounded, (2) oval and subangular to subrounded, (3) elongated and rounded.

**AT-04:** (1) round and rounded, (2) oval and rounded, (3) elongated and subangular to subrounded.

**CC-08-135:** (1) round and euhedral, (2) oval and subangular to subrounded, (3) elongated and subangular to subrounded.

**QC-08-39:** (1) round and subangular to subrounded, (2) oval and rounded, (3) oval and subangular to subrounded, (4) elongated and euhedral.

**CP-08-09:** (1) round and subangular to subrounded, (2) elongated and subangular to subrounded, (3) elongated and euhedral.

**SA-08-125:** (1) round and euhedral, (2) elongated and subangular to subrounded, (3) oval and subangular to subrounded.

**MS-08-60:** (1) oval and subangular to subrounded, (2) elongated and subangular to subrounded, (3) elongated and euhedral.

**CO-128:** (1) round and subangular to subrounded, (2) oval and euhedral, (3) elongated and euhedral.

**CC-08-139:** (1) round and subangular to subrounded, (2) oval and rounded, (3) elongated and subangular to subrounded.

CL-08-66

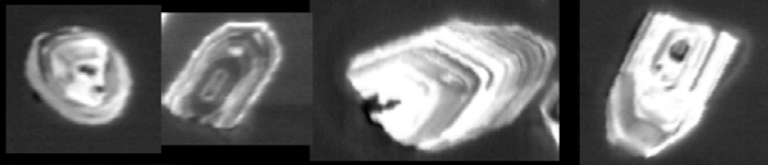

87RG3

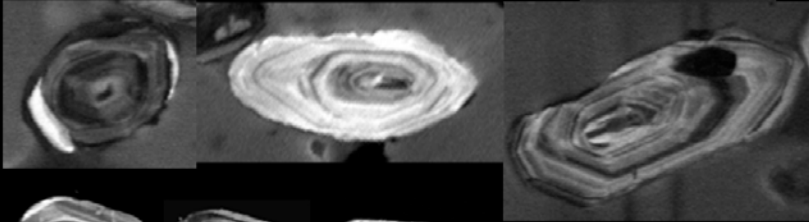

SdR-138

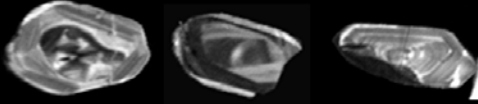

200  $\mu$ m

CL-08-73

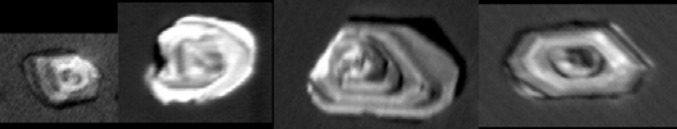

02-66

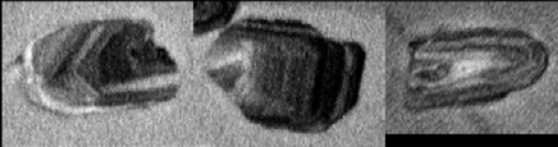

AT-04

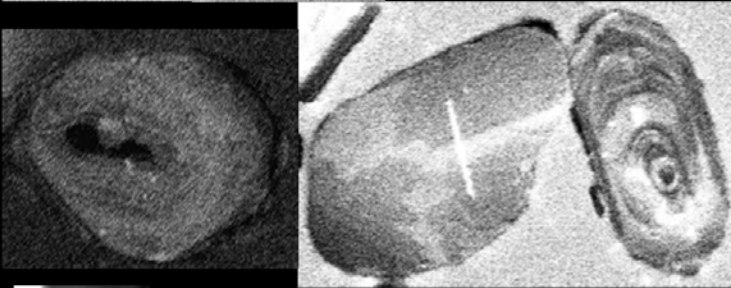

CC-08-135

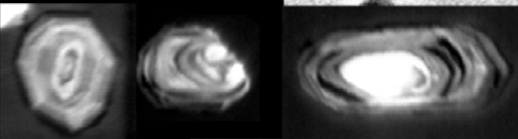

200  $\mu$ m

QC-08-39

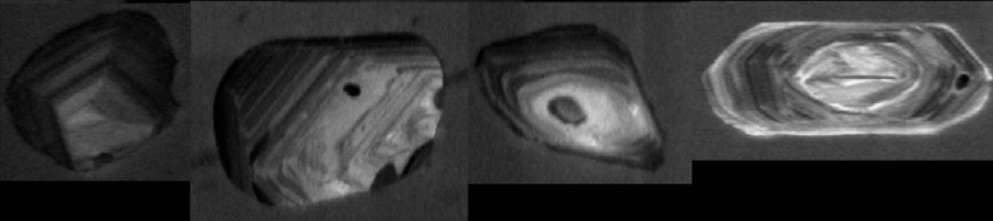

CP-08-09

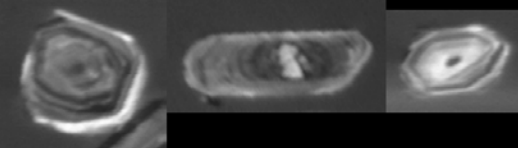

SA-08-125

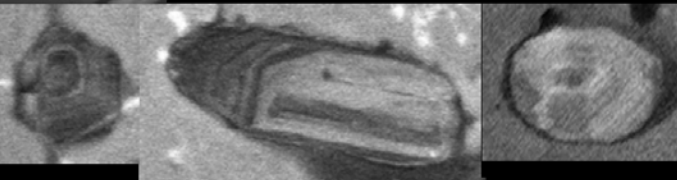

MS-08-60

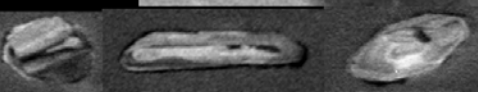

CO-128

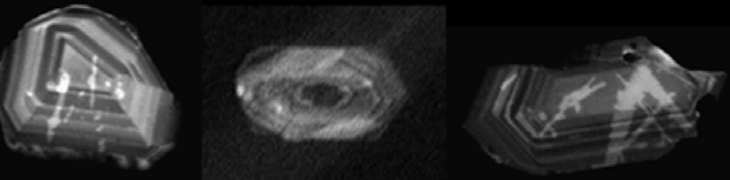

CC-08-139

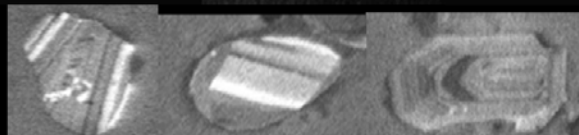

200  $\mu$ m
